# Supplementary material
Source: HighWire-hosted journal article supplement (http://rc.rcjournal.com/highwire/filestream/21544/field_highwire_adjunct_files/0/rc-09186-File004.docx)
Supplement: rc-09186-File004.docx [file rc-09186-File004.docx]

Supplemental Table A

| **Supplemental Table A - Arterial blood gas measurements and HFJV settings over time** | | | | | |
| --- | --- | --- | --- | --- | --- |
|  | Pre-HFJV | 4-6 hrs post HFJV |  | 24 hrs post HFJV | 48 hrs post HFJV |
| Arterial blood gas, n | 25/27 | 23/27 |  | 16/27 | 10/27 |
| pH | 7.22 (7.17-7.31) | 7.34 (7.25-7.43) | 0.001 | 7.38 (7.32-7.40) | 7.36 (7.29-7.45) |
| PaCO2, mmHg | 69 (51.0-76.5) | 50.0 (41.0-69.0) | 0.001 | 46 (36.8-58.8) | 46 (40.8-64.3) |
| PaO2, mmHg | 51.0 (41.0-76.0) | 53.0 (43.0-66.0) | 0.87 | 58 (45.8-74.0) | 48 (42.0-62.5) |
| Base excess, mmol/L | -2 (-3.5-2.0) | -1.0 (-3.0-2.0) | 0.29 | 3 (-2.8-7.8) | 0.5 (-3.3-9.5) |
| HCO3-, mEq/L | 28 (25.0-30.0) | 27.0 (23.0-30.0) | 0.057 | 26.5 (22.5-34.8) | 29.5 (21.5-35.0) |
| Lactate, mmol/L | 1.5 (0.9-3.9), n=16 | 2 (1.5-2.6), n=11 | 0.94 | 1.0 (0.8-2.2), n=5 | 1.7 (0.9-n/a), n=2 |
| HFJV Settings, n | 27/27 | 22/27* |  | 16/27 | 10/27 |
| Measured mPaw, cmH2O | 15 (12-15) | 14.1 (11.5-18.2) | 0.97 | 17.4 (11.7-20.2) | 17.1 (12.0-19.6) |
| PIP, cmH2O | 45 (36-50) | 41 (35-47) | 0.11 | 38 (34-48) | 43.5 (36.8-50) |
| Respiratory frequency, breaths/min | 360 (360-380) | 360 (300-360) | 0.10 | 360 (300-360) | 300 (270-365) |
| Inspiratory time, s | 0.02 (0.02-0.03) | 0.02 (0.02-0.03) | 0.03 | 0.03 (0.02-0.03) | 0.03 (0.03-0.03) |
| FiO2 | 1.00 (0.60-1.00) | 0.80 (0.40-1.00) | 0.26 | 0.60 (0.43-0.98) | 0.70 (0.58-1.00) |
| Conventional Mechanical Ventilation settings | | |  |  |  |
| Respiratory frequency, breaths/min | 30 (28-35) | 5 (5-5) | NR | 5 (5-8) | 5 (5-10) |
| Inspiratory pressure, cmH2O | 22 (20-25) | 16.0 (15.5-18.0) | NR | 16 (13-17) | 16 (14-17) |
| Set PEEP, cmH2O | 8 (6-10) | 10 (7-12) | NR | 10.5 (9-12) | 12 (8.8-12.5) |

Table legend: Continuous variables are presented as median (interquartile range) and categorical variables as n (%), mPaw=mean airway pressure, PIP=peak inspiratory pressure, NR=not reported

*=unable to determine HFJV settings in one subject.
